# Supplementary material for: A subtle relationship between substrate stiffness and collective migration of cell clusters
Source: Royal Society of Chemistry journal article supplement (doi:10.1039/c9sm01893j), 2020-01-01
Supplement: c9sm01893j1.pdf [file c9sm01893j1.pdf]

## A subtle relationship between substrate stiffness and collective migration of cell clusters – Supplementary Information

Hayri E. Balcioglu<sup>a</sup>, Lakshmi Balasubramaniam<sup>b</sup>, Tomita Vasilica Stirbat<sup>b</sup>, Bryant L. Doss<sup>a</sup>, Marc-Antoine Fardin<sup>b</sup>, René-Marc Mège<sup>b</sup>, Benoit Ladoux<sup>b,\*</sup>

### Movie S1

Movie showing expansion of an HI-GFP MDCK cell island seeded on 6.5 kPa polyacrylamide gel 0-20 hours after stencil removal.

### Movie S2

Movie showing expansion of an HI-GFP MDCK cell island seeded on 21 kPa polyacrylamide gel 0-20 hours after stencil removal.

### Movie S3

Movie showing expansion of an HI-GFP MDCK cell island seeded on 61 kPa polyacrylamide gel 0-20 hours after stencil removal.

---

<sup>a</sup> *Mechanobiology Institute, National University of Singapore, Singapore 117411, Singapore*

<sup>b</sup> *Université de Paris, CNRS, Institut Jacques Monod, 75013 Paris, France*

\* *correspondence: [benoit.ladoux@ijm.fr](mailto:benoit.ladoux@ijm.fr)*
